# Supplementary material
Source: publisher figshare collection journal article supplement (https://tandf.figshare.com/ndownloader/files/16235741)
Supplement: Supplementary file 1 [file 16235741]

### 8. Supplementary Information: Detailed Computational Results

In this online supplement, we present the detailed results on the benchmark instances.

| **Table 14.:**   | Results on the largest instances of the OR Library for the MS-CFLP, i.e., the cap instances (A, B, and C). All these instances have 100 facilities and 1000 customers. Instances in this set have previously been solved to optimality by [Guastaroba and Speranza](#Xguastaroba:speranza:12) ([2012](#Xguastaroba:speranza:12)). The table reports the optimal value obtained by cplex, the value obtained by the proposed algorithm, along with the corresponding running times. |  | | --- | --- | | | |  | | |
| --- | --- | --- | --- | --- | --- | --- | --- |
|  |  |  |  |  |  |
| Name | opt | cm | gap% | cplex time | cm time |
|  |  |  |  |  |  |
|  |  |  |  |  |  |
|  |  |  |  |  |  |
|  |  |  |  |  |  |
| OR Library - capA | | |  |  |  |
|  |  |  |  |  |  |
| 1 | 19240822.44865 | 19240822.44865 | 0.0 | 1551 | 20 |
| 2 | 18438046.54328 | 18438046.54328 | 0.0 | 5775 | 21 |
| 3 | 17765201.94899 | 17765201.94899 | 0.0 | 4653 | 20 |
| 4 | 17160439.01258 | 17160439.01258 | 0.0 | 3488 | 30 |
|  |  |  |  |  |  |
| OR Library - capB | | |  |  |  |
|  |  |  |  |  |  |
| 1 | 13656379.57755 | 13656379.57755 | 0.0 | 291 | 200 |
| 2 | 13361927.44924 | 13361927.44924 | 0.0 | 468 | 117 |
| 3 | 13198556.43400 | 13198556.43400 | 0.0 | 1407 | 134 |
| 4 | 13082516.49637 | 13082516.49637 | 0.0 | 4281 | 20 |
|  |  |  |  |  |  |
| OR Library - capC | | |  |  |  |
|  |  |  |  |  |  |
| 1 | 11646596.97404 | 11646596.97404 | 0.0 | 276 | 188 |
| 2 | 11570340.28884 | 11570340.28884 | 0.0 | 274 | 173 |
| 3 | 11518743.74360 | 11518743.74360 | 0.0 | 375 | 154 |
| 4 | 11505767.39444 | 11505767.39444 | 0.0 | 1029 | 23 |
|  |  |  |  |  |  |
|  |  |  |  |  |  |
|  |  |  |  |  |  |
|  |  |  |  |  |  |
|  |  |  |  |  |  |
|  |  |  |  |  |  |
|  |  |  |  |  |  |
|  |  |  |  |  |  |

| **Table 15.:**   | Results on Test Bed 1 for the MS-CFLP. The symbol ♯ indicates discrepancies with the optimal values reported in the literature. That is, the optimal value we obtain with cplex is different from the value reported in [Avella and Boccia](#Xavella:boccia:09) ([2009](#Xavella:boccia:09)) and [Guastaroba and Speranza](#Xguastaroba:speranza:12) ([2012](#Xguastaroba:speranza:12)). |  | | --- | --- | | | |  | |
| --- | --- | --- | --- | --- | --- | --- |
|  |  |  |  |  |
| Name | opt | cm | gap% | cm time |
|  |  |  |  |  |
|  |  |  |  |  |
|  |  |  |  |  |
|  |  |  |  |  |
| Test Bed 1 - 300x300 | | |  |  |
|  |  |  |  |  |
| 1 | 16350.6606 | 16350.6606 | 0.0 | 6 |
| 2 | 15948.4466 | 15948.4466 | 0.0 | 7 |
| 3 | 15474.9197 | 15474.9197 | 0.0 | 5 |
| 4 | 17989.9790 | 17989.9790 | 0.0 | 5 |
| 5 | 18037.6185 | 18037.6185 | 0.0 | 5 |
| 6 | 11251.1995 | 11251.1995 | 0.0 | 6 |
| 7 | 11392.5269 | 11392.5269 | 0.0 | 6 |
| 8 | 11377.3435 | 11377.3435 | 0.0 | 5 |
| 9 | 10878.0527 | 10878.0527 | 0.0 | 6 |
| 10 | 11232.7757 | 11232.7757 | 0.0 | 4 |
| 11 | 10023.9413 | 10023.9413 | 0.0 | 11 |
| 12 | 9336.8823 | 9336.8823 | 0.0 | 4 |
| 13 | 10058.6704 | 10058.6704 | 0.0 | 11 |
| 14 | 9699.3566 | 9699.3566 | 0.0 | 8 |
| 15 | 9842.4071 | 9842.4071 | 0.0 | 4 |
| 16 | 9158.7586 | 9158.7586 | 0.0 | 9 |
| 17 | 9171.6717 | 9171.6717 | 0.0 | 6 |
| 18 | 9553.5984 | 9553.5984 | 0.0 | 19 |
| 19 | 9053.7134 | 9053.7134 | 0.0 | 5 |
|  |  |  |  |  |
| 20 | 9046.3316 | 9046.3316 | 0.0 | 7 |
|  |  |  |  |  |
| Test Bed 1 - 500x500 | | |  |  |
|  |  |  |  |  |
| 1 | 26412.4189 | 26412.4189 | 0.0 | 20 |
| 2 | 28130.7416 | 28130.7416 | 0.0 | 38 |
| 3 | 27904.5166 | 27904.5166 | 0.0 | 19 |
| 4 | 28159.0315 | 28159.0315 | 0.0 | 26 |
| 5 | 24702.7737 | 24702.7737 | 0.0 | 39 |
| 6 | 15756.8216 | 15756.8216 | 0.0 | 26 |
| 7 | 16109.2850 | 16109.2850 | 0.0 | 30 |
| 8 | 16041.7341 | 16041.7341 | 0.0 | 39 |
| 9 | 16327.7171 | 16327.7171 | 0.0 | 69 |
| 10 | 15815.1317 | 15815.1317 | 0.0 | 41 |
| 11 | 13437.7220 | 13437.7220 | 0.0 | 31 |
| 12 | 14675.0261 | 14675.0261 | 0.0 | 80 |
| 13 | 13666.2525 | 13666.2525 | 0.0 | 48 |
| 14 | 13580.0167 | 13580.0167 | 0.0 | 51 |
| 15 | 13896.7614 | 13896.7614 | 0.0 | 36 |
| 16 | 12584.4897 | 12584.4897 | 0.0 | 54 |
| 17 | 13347.4007 | 13347.4007 | 0.0 | 31 |
| 18 | 12831.1292 | 12831.1292 | 0.0 | 78 |
|  |  |  |  |  |
| 19 | 13489.6153 | 13489.6153 | 0.0 | 56 |
| 20 | 12342.2646 | 12342.2646 | 0.0 | 39 |
|  |  |  |  |  |
| Test Bed 1 - 300x1500 | | |  |  |
|  |  |  |  |  |
| 1 | 154750.4368 | 154750.4368 | 0.0 | 45 |
| 2 | 159256.5459 | 159256.5459 | 0.0 | 43 |
| 3 | 157011.4594♯ | 157011.4594 | 0.0 | 137 |
| 4 | 157406.3373 | 157406.3373 | 0.0 | 78 |
| 5 | 160946.2056 | 160946.2056 | 0.0 | 43 |
| 6 | 156621.1815 | 156621.1815 | 0.0 | 81 |
| 7 | 156950.2258 | 156950.2258 | 0.0 | 79 |
| 8 | 157687.6105 | 157687.6105 | 0.0 | 97 |
| 9 | 156893.9003 | 156893.9003 | 0.0 | 136 |
| 10 | 157678.4994 | 157678.4994 | 0.0 | 48 |
| 11 | 149995.7510♯ | 149995.7510 | 0.0 | 123 |
| 12 | 154883.4977 | 154883.4977 | 0.0 | 50 |
| 13 | 151593.0307 | 151593.0307 | 0.0 | 39 |
| 14 | 151830.9785 | 151830.9785 | 0.0 | 47 |
| 15 | 156417.4470 | 156417.4470 | 0.0 | 46 |
| 16 | 155523.5002 | 155523.5002 | 0.0 | 90 |
| 17 | 156033.3292 | 156033.3292 | 0.0 | 49 |
|  |  |  |  |  |
| 18 | 156777.5816 | 156777.5816 | 0.0 | 55 |
| 19 | 155946.2639 | 155946.2639 | 0.0 | 54 |
| 20 | 156409.3974♯ | 156409.3974 | 0.0 | 64 |
|  |  |  |  |  |
| Test Bed 1 - 700x700 | | |  |  |
|  |  |  |  |  |
| 1 | 36905.93311 | 36905.9331 | 0.0 | 78 |
| 2 | 34311.71643 | 34311.7164 | 0.0 | 107 |
| 3 | 34294.63941 | 34294.6394 | 0.0 | 29 |
| 4 | 38090.90615 | 38090.9062 | 0.0 | 77 |
| 5 | 37802.10608 | 37802.1061 | 0.0 | 76 |
| 6 | 19910.67542 | 19910.6754 | 0.0 | 142 |
| 7 | 21297.30195 | 21297.3020 | 0.0 | 143 |
| 8 | 20659.96411 | 20659.9641 | 0.0 | 75 |
| 9 | 20979.88807 | 20979.8881 | 0.0 | 141 |
| 10 | 22055.41750 | 22055.4175 | 0.0 | 87 |
| 11 | 17120.15682 | 17120.7988 | 0.0 | 239 |
| 12 | 18130.42520 | 18130.4252 | 0.0 | 136 |
| 13 | 17239.96949 | 17239.9695 | 0.0 | 79 |
| 14 | 17337.63248 | 17337.6325 | 0.0 | 152 |
| 15 | 18145.49774 | 18145.4977 | 0.0 | 211 |
| 16 | 16000.03683 | 16000.0368 | 0.0 | 159 |
|  |  |  |  |  |
| 17 | 16171.67369 | 16171.6737 | 0.0 | 258 |
| 18 | 16414.80721 | 16414.8072 | 0.0 | 61 |
| 19 | 16366.78591 | 16366.7859 | 0.0 | 615 |
| 20 | 15434.21882 | 15434.2188 | 0.0 | 152 |
|  |  |  |  |  |
| Test Bed 1 - 1000x1000 | | |  |  |
|  |  |  |  |  |
| 1 | 49509.81628 | 49509.8163 | 0.0 | 113 |
| 2 | 50688.09936 | 50688.0994 | 0.0 | 222 |
| 3 | 47202.64124 | 47202.6412 | 0.0 | 67 |
| 4 | 48868.54518 | 48868.5452 | 0.0 | 113 |
| 5 | 50743.54225 | 50743.5422 | 0.0 | 88 |
| 6 | 27823.84819 | 27823.8482 | 0.0 | 221 |
| 7 | 27252.32737 | 27252.3274 | 0.0 | 223 |
| 8 | 27375.37740 | 27375.3774 | 0.0 | 209 |
| 9 | 26857.09399 | 26857.0940 | 0.0 | 183 |
| 10 | 27186.99621 | 27186.9962 | 0.0 | 214 |
| 11 | 22180.33832 | 22180.3383 | 0.0 | 219 |
| 12 | 22160.39649 | 22160.3965 | 0.0 | 777 |
| 13 | 22648.24524♯ | 22648.2452 | 0.0 | 352 |
| 14 | 22312.01789 | 22312.0179 | 0.0 | 222 |
| 15 | 22627.62708♯ | 22627.6271 | 0.0 | 211 |
|  |  |  |  |  |
| 16 | 21331.81641 | 21331.8164 | 0.0 | 522 |
| 17 | 21188.89103 | 21188.8910 | 0.0 | 331 |
| 18 | 20713.43382 | 20713.4338 | 0.0 | 113 |
| 19 | 20537.45197 | 20537.4520 | 0.0 | 198 |
| 20 | 21560.86386 | 21560.8639 | 0.0 | 213 |
|  |  |  |  |  |
|  |  |  |  |  |
|  |  |  |  |  |
|  |  |  |  |  |
|  |  |  |  |  |
|  |  |  |  |  |
|  |  |  |  |  |
|  |  |  |  |  |

| **Table 16.:**   | Results on Test Bed A for MS-CFLP. In the column cplex, the symbol o indicates that the solution is within the optimality tolerance (1×10-8), while the symbol t indicates that an optimal solution was not found within the time limit of 10,000 cpu seconds. In both cases, the corresponding value in the column cplex lb is different from the best solution found by cplex. Column cm gap provides the gap between the best lower bound found by cplex and the solution found by the proposed algorithm. The symbol * in column cm indicates that the proposed algorithm found an optimal solution. |  | | --- | --- | | | |  | | | |
| --- | --- | --- | --- | --- | --- | --- | --- | --- |
|  |  |  |  |  |  |  |
| Name | cplex | cm | cplex lb | cm gap | cplex time | cm time |
|  |  |  |  |  |  |  |
|  |  |  |  |  |  |  |
|  |  |  |  |  |  |  |
|  |  |  |  |  |  |  |
| Test Bed A - 1000x1000 | | |  |  |  |  |
|  |  |  |  |  |  |  |
| 1 | 920505.22445 | 920505.22445* | 920505.22445 | 0.0000 | 252 | 80 |
| 2 | 920834.16909 | 920834.16909* | 920834.16909 | 0.0000 | 765 | 113 |
| 3 | 931305.42212 | 931305.42212* | 931305.42212 | 0.0000 | 1044 | 115 |
| 4 | 917951.67276 | 917951.67276* | 917951.67276 | 0.0000 | 762 | 112 |
| 5 | 915635.35050 | 915635.35050* | 915635.35050 | 0.0000 | 220 | 213 |
| 6 | 530737.47132o | 530737.73144* | 530737.47107 | 0.0000 | 3594 | 220 |
| 7 | 570792.94414 | 570792.94414* | 570792.94414 | 0.0000 | 8782 | 328 |
| 8 | 573827.77861 | 573827.77861* | 573827.77861 | 0.0000 | 880 | 114 |
| 9 | 556686.44779 | 556686.44788* | 556686.44779 | 0.0000 | 1626 | 516 |
| 10 | 543599.77830 | 543599.77830* | 543599.77830 | 0.0000 | 789 | 90 |
| 11 | 350069.26967 | 350069.26967* | 350069.26967 | 0.0000 | 931 | 47 |
| 12 | 311516.15073 | 311516.15073* | 311516.15073 | 0.0000 | 722 | 75 |
| 13 | 331149.17475 | 331149.17477* | 331149.17475 | 0.0000 | 426 | 155 |
| 14 | 334622.61070 | 334622.61070* | 334622.61070 | 0.0000 | 161 | 122 |
| 15 | 347407.29584 | 347407.29584* | 347407.29584 | 0.0000 | 1638 | 446 |
| 16 | 95959.21666 | 95959.21666* | 95959.21666 | 0.0000 | 184 | 95 |
| 17 | 93998.80723 | 93998.80723* | 93998.80723 | 0.0000 | 370 | 203 |
| 18 | 95737.23238 | 95737.23238* | 95737.23238 | 0.0000 | 2418 | 332 |
| 19 | 91057.26173 | 91057.26173* | 91057.26173 | 0.0000 | 292 | 76 |
|  |  |  |  |  |  |  |
| 20 | 97280.06753 | 97280.06753* | 97280.06753 | 0.0000 | 331 | 62 |
| 21 | 49884.82588 | 49884.82588* | 49884.82588 | 0.0000 | 305 | 86 |
| 22 | 51137.53722 | 51137.53722* | 51137.53722 | 0.0000 | 674 | 567 |
| 23 | 50060.79298 | 50060.79298* | 50060.79298 | 0.0000 | 434 | 222 |
| 24 | 50504.31549 | 50504.31549* | 50504.31549 | 0.0000 | 960 | 232 |
| 25 | 48338.05942 | 48338.05942* | 48338.05942 | 0.0000 | 8309 | 902 |
| 26 | 27490.95601 | 27490.95601* | 27490.95601 | 0.0000 | 1686 | 777 |
| 27 | 26586.94385 | 26586.94385* | 26586.94385 | 0.0000 | 1611 | 334 |
| 28 | 26563.89072 | 26563.89072* | 26563.89072 | 0.0000 | 639 | 218 |
| 29 | 27859.42135 | 27859.42135* | 27859.42135 | 0.0000 | 3064 | 446 |
| 30 | 26825.19503 | 26825.19503* | 26825.19503 | 0.0000 | 2303 | 223 |
|  |  |  |  |  |  |  |
| Test Bed A - 800x4400 | | |  |  |  |  |
|  |  |  |  |  |  |  |
| 1 | 745157.62523 | 745157.62523* | 745157.62523 | 0.0000 | 3852 | 554 |
| 2 | 742345.88184 | 742345.88184* | 742345.88184 | 0.0000 | 4120 | 201 |
| 3 | 747284.67896 | 747284.67896* | 747284.67896 | 0.0000 | 2078 | 351 |
| 4 | 754884.22567 | 754884.22567* | 754884.22567 | 0.0000 | 327 | 185 |
| 5 | 749490.69026 | 749494.55980 | 749490.69026 | 0.0005 | 3050 | 645 |
| 6 | 432590.79806t | 432590.79806 | 432552.92257 | 0.0088 | 10000 | 532 |
| 7 | 447436.80664 | 447449.88660 | 447436.80664 | 0.0029 | 7228 | 213 |
| 8 | 468724.72501 | 468738.18010 | 468724.72501 | 0.0029 | 3831 | 319 |
|  |  |  |  |  |  |  |
| 9 | 424875.96520 | 424895.67450 | 424875.96520 | 0.0046 | 4220 | 422 |
| 10 | 441218.45184 | 441218.45184* | 441218.45184 | 0.0000 | 4037 | 157 |
| 11 | 290546.19753 | 290546.19753* | 290546.19753 | 0.0000 | 2710 | 815 |
| 12 | 292210.14819 | 292210.14819* | 292210.14819 | 0.0000 | 4004 | 458 |
| 13 | 304561.73711 | 304567.95189 | 304561.73711 | 0.0020 | 5665 | 367 |
| 14 | 304417.41462 | 304417.41462* | 304417.41462 | 0.0000 | 5603 | 222 |
| 15 | 282870.37226 | 282870.37226* | 282870.37226 | 0.0000 | 1719 | 189 |
| 16 | 100662.71955 | 100694.90840 | 100662.71955 | 0.0320 | 5973 | 245 |
| 17 | 99972.38603t | 99978.12592 | 99843.01331 | 0.1353 | 10096 | 424 |
| 18 | 103930.87431t | 103920.56991 | 103783.88424 | 0.1317 | 10086 | 215 |
| 19 | 104689.01140 | 104689.01140* | 104689.01140 | 0.0000 | 4822 | 674 |
| 20 | 102453.94740 | 102453.94740* | 102453.94740 | 0.0000 | 4752 | 734 |
| 21 | 72539.13730t | 72541.04827 | 72416.5921 | 0.1719 | 10000 | 1203 |
| 22 | 70821.31580t | 70803.08250 | 70609.0953 | 0.2747 | 10000 | 215 |
| 23 | 72794.70760t | 72760.59432 | 72482.2763 | 0.3840 | 10000 | 214 |
| 24 | 73006.61677t | 73001.99800 | 72721.51794 | 0.3857 | 10095 | 240 |
| 25 | 74527.65349t | 74593.48427 | 74273.80913 | 0.4304 | 10084 | 370 |
| 26 | 59499.34230 | 59575.58184 | 59499.34230 | 0.1281 | 5569 | 195 |
| 27 | 58852.11067 | 58899.63814 | 58852.11067 | 0.0808 | 5909 | 263 |
| 28 | 60063.03417t | 60064.73190 | 59888.15839 | 0.2948 | 10083 | 165 |
|  |  |  |  |  |  |  |
| 29 | 57936.39921 | 57995.61105 | 57936.39921 | 0.1022 | 6801 | 452 |
| 30 | 58041.44423 | 58062.50504 | 58041.44423 | 0.0363 | 3360 | 269 |
|  |  |  |  |  |  |  |
| Test Bed A - 1000x4000 | | |  |  |  |  |
|  |  |  |  |  |  |  |
| 1 | 935346.19236 | 935346.19236* | 935346.19236 | 0.0000 | 848 | 135 |
| 2 | 961530.55676 | 961530.55676* | 961530.55676 | 0.0000 | 6163 | 511 |
| 3 | 924322.09106 | 924322.09106* | 924322.09106 | 0.0000 | 784 | 168 |
| 4 | 961794.30851 | 961794.30851* | 961794.30851 | 0.0000 | 1470 | 161 |
| 5 | 955174.82778 | 955178.90176 | 955174.82778 | 0.0004 | 7770 | 797 |
| 6 | 559009.85914 | 559009.85914* | 559009.85914 | 0.0000 | 4553 | 2327 |
| 7 | 582189.88438 | 582189.88438* | 582189.88438 | 0.0000 | 7527 | 173 |
| 8 | 572170.10414 | 572170.10414* | 572170.10414 | 0.0000 | 8274 | 1835 |
| 9 | 537074.91340 | 537074.91340* | 537074.91340 | 0.0000 | 4031 | 468 |
| 10 | 562949.07447 | 562949.07447* | 562949.07447 | 0.0000 | 6183 | 319 |
| 11 | 338880.03645 | 338880.03645* | 338880.03645 | 0.0000 | 2699 | 2021 |
| 12 | 353171.94813 | 353171.94813* | 353171.94813 | 0.0000 | 5175 | 4125 |
| 13 | 354229.64893 | 354231.86193 | 354229.64893 | 0.0006 | 4664 | 631 |
| 14 | 368438.25806 | 368438.25806* | 368438.25806 | 0.0000 | 4628 | 1507 |
| 15 | 359137.89462 | 359137.89462* | 359137.89462 | 0.0000 | 6255 | 1249 |
| 16 | 113966.86069t | 1113966.86069 | 113954.83995 | 0.0105 | 10004 | 928 |
| 17 | 116302.25560 | 116302.25560* | 116302.25560 | 0.0000 | 6270 | 1334 |
|  |  |  |  |  |  |  |
| 18 | 119521.78726 | 119521.78726* | 119521.78726 | 0.0000 | 4856 | 1324 |
| 19 | 113859.71489t | 1113861.37811 | 113804.89438 | 0.0496 | 10005 | 342 |
| 20 | 119546.23213t | 1119546.10402 | 119517.31115 | 0.0241 | 10004 | 319 |
| 21 | 74419.63564t | 74419.63564 | 74322.18194 | 0.1311 | 10005 | 1318 |
| 22 | 72594.06635t | 72620.17408 | 72497.72459 | 0.1689 | 10003 | 4313 |
| 23 | 76095.52045t | 76095.52045 | 75984.69926 | 0.1458 | 10005 | 1492 |
| 24 | 72333.93963t | 72333.93963 | 72193.26435 | 0.1949 | 10003 | 1047 |
| 25 | 73265.55547t | 73282.80882 | 73128.73286 | 0.2107 | 10004 | 338 |
| 26 | 55590.87110 | 55590.87110* | 55590.87110 | 0.0000 | 8139 | 1883 |
| 27 | 58271.91001t | 58293.80937 | 58185.22687 | 0.1866 | 10001 | 1916 |
| 28 | 55869.13169 | 55869.13169* | 55869.13169 | 0.0000 | 6944 | 1396 |
| 29 | 55853.15327 | 55853.15327* | 55853.15327 | 0.0000 | 8129 | 1475 |
| 30 | 54939.91068 | 54939.91068* | 54939.91068 | 0.0000 | 9617 | 1909 |
|  |  |  |  |  |  |  |
| Test Bed A - 1200x3000 | | |  |  |  |  |
|  |  |  |  |  |  |  |
| 1 | 1081002.01820 | 1081002.01820* | 1081002.01820 | 0.0000 | 7098 | 952 |
| 2 | 1107883.62200 | 1107883.62200* | 1107883.62200 | 0.0000 | 3832 | 163 |
| 3 | 1078677.41980 | 1078677.41980* | 1078677.41980 | 0.0000 | 3205 | 959 |
| 4 | 1113783.82287 | 1113783.82287* | 1113783.82287 | 0.0000 | 2445 | 161 |
| 5 | 1087166.44553 | 1087166.44553* | 1087166.44553 | 0.0000 | 2989 | 163 |
| 6 | 627192.89110o | 627192.89110* | 627192.89072 | 0.0000 | 6020 | 459 |
|  |  |  |  |  |  |  |
| 7 | 636045.11016 | 636045.11016* | 636045.11016 | 0.0000 | 5938 | 1039 |
| 8 | 699767.23959t | 699774.02638 | 699763.93815 | 0.0014 | 10001 | 790 |
| 9 | 660310.50969 | 660310.50969* | 660310.50969 | 0.0000 | 8487 | 1940 |
| 10 | 638753.46363 | 638753.46363* | 638753.46363 | 0.0000 | 5527 | 304 |
| 11 | 410938.10766 | 410938.10766* | 410938.10766 | 0.0000 | 3902 | 1827 |
| 12 | 404562.92392 | 404562.92392* | 404562.92392 | 0.0000 | 3503 | 467 |
| 13 | 426698.57867 | 426698.57867* | 426698.57867 | 0.0000 | 3659 | 1633 |
| 14 | 414823.40034 | 414823.40034* | 414823.40034 | 0.0000 | 1653 | 283 |
| 15 | 410574.05705 | 410574.05705* | 410574.05705 | 0.0000 | 1855 | 1512 |
| 16 | 125832.09106t | 125832.09106 | 125808.57286 | 0.0187 | 10004 | 1246 |
| 17 | 124868.80963 | 124868.80963* | 124868.80963 | 0.0000 | 7706 | 920 |
| 18 | 126550.88017 | 126557.06710 | 126550.88017 | 0.0049 | 4873 | 630 |
| 19 | 130075.33724 | 130075.33724* | 130075.33724 | 0.0000 | 8958 | 1304 |
| 20 | 120937.95303t | 120944.46788 | 120928.22902 | 0.0134 | 10003 | 1108 |
| 21 | 73073.32990 | 73073.32990* | 73073.32990 | 0.0000 | 3199 | 630 |
| 22 | 70737.12961t | 70737.12961 | 70693.68900 | 0.0614 | 10003 | 1034 |
| 23 | 70985.54482t | 70996.56369 | 70963.24917 | 0.0469 | 10003 | 939 |
| 24 | 73184.62538t | 73184.62538 | 73181.83738 | 0.0038 | 10001 | 1418 |
| 25 | 74469.66385t | 74469.66385 | 74445.07024 | 0.0330 | 10001 | 1141 |
| 26 | 47911.27380 | 47911.27380* | 47911.27380 | 0.0000 | 7865 | 1252 |
|  |  |  |  |  |  |  |
| 27 | 47686.27851t | 47689.99223 | 47650.07404 | 0.0838 | 10001 | 1451 |
| 28 | 48650.36831t | 48650.36831 | 48548.65585 | 0.2095 | 10002 | 1647 |
| 29 | 48084.83671t | 48084.83671 | 47958.40999 | 0.2636 | 10003 | 1005 |
| 30 | 48638.07008t | 48638.07008 | 48551.92671 | 0.1774 | 10003 | 1690 |
|  |  |  |  |  |  |  |
| Test Bed A - 2000x2000 | | |  |  |  |  |
|  |  |  |  |  |  |  |
| 1 | 1821914.12536o | 1821914.12536* | 1821914.12459 | 0.0000 | 1921 | 167 |
| 2 | 1848136.28654 | 1848136.28654* | 1848136.28654 | 0.0000 | 9163 | 167 |
| 3 | 1799167.06916 | 1799167.06916* | 1799167.06916 | 0.0000 | 3460 | 1457 |
| 4 | 1851083.97392 | 1851083.97392* | 1851083.97392 | 0.0000 | 1077 | 134 |
| 5 | 1848195.35730t | 1848195.35730 | 1848169.33693 | 0.0014 | 10003 | 169 |
| 6 | 1061472.74153 | 1061472.74153* | 1061472.74153 | 0.0000 | 3184 | 312 |
| 7 | 1042839.28798 | 1042839.28798* | 1042839.28798 | 0.0000 | 4945 | 455 |
| 8 | 1044710.02171 | 1044710.02171* | 1044710.02171 | 0.0000 | 5834 | 311 |
| 9 | 1096267.38773t | 1096267.38773 | 1096256.61394 | 0.0010 | 10004 | 602 |
| 10 | 1032307.23886t | 1032307.23886 | 1032299.55543 | 0.0007 | 10003 | 598 |
| 11 | 642711.60048t | 642711.60048 | 642705.36268 | 0.0010 | 10003 | 479 |
| 12 | 684919.86956t | 684920.87239 | 684913.34062 | 0.0011 | 10004 | 321 |
| 13 | 648821.96878 | 648821.96878* | 648821.96878 | 0.0000 | 5324 | 787 |
| 14 | 661298.62236 | 661298.62236* | 661298.62236 | 0.0000 | 864 | 294 |
| 15 | 699290.01601 | 699290.01601* | 699290.01601 | 0.0000 | 5179 | 266 |
|  |  |  |  |  |  |  |
| 16 | 183580.50872 | 183580.50872* | 183580.50872 | 0.0000 | 4050 | 180 |
| 17 | 192332.35807 | 192332.35807* | 192332.35807 | 0.0000 | 9840 | 110 |
| 18 | 181451.61687o | 181451.61687* | 181451.61671 | 0.0000 | 6138 | 141 |
| 19 | 185587.06511 | 185587.06511* | 185587.06511 | 0.0000 | 5331 | 125 |
| 20 | 177992.43989o | 177992.43989* | 177992.43980 | 0.0000 | 5159 | 255 |
| 21 | 93236.56796 | 93236.56796* | 93236.56796 | 0.0000 | 8224 | 138 |
| 22 | 94302.29782 | 94302.29782* | 94302.29782 | 0.0000 | 5644 | 783 |
| 23 | 95904.06311t | 95906.06310 | 95895.46589 | 0.0111 | 10003 | 171 |
| 24 | 96221.19070 | 96221.19070* | 96221.19070 | 0.0000 | 5392 | 132 |
| 25 | 94113.42537 | 94113.42537* | 94113.42537 | 0.0000 | 9969 | 188 |
| 26 | 47491.43685t | 47491.43685 | 47437.12625 | 0.1145 | 10004 | 105 |
| 27 | 48177.94688t | 48189.86112 | 48127.08913 | 0.1304 | 10003 | 797 |
| 28 | 47687.62023t | 47687.62023 | 47659.79520 | 0.0584 | 10003 | 938 |
| 29 | 47036.66432t | 47037.90968 | 47011.16032 | 0.0569 | 10003 | 142 |
| 30 | 48982.83142t | 48982.83142 | 48912.15325 | 0.1445 | 10003 | 105 |
|  |  |  |  |  |  |  |
|  |  |  |  |  |  |  |
|  |  |  |  |  |  |  |
|  |  |  |  |  |  |  |
|  |  |  |  |  |  |  |
|  |  |  |  |  |  |  |
|  |  |  |  |  |  |  |
|  |  |  |  |  |  |  |

| **Table 17.:**   | Results on Test Bed B for MS-CFLP. In the column cplex, the symbol m indicates that the solver ran out of memory. In this case, we report the best lower and upper bound obtained during the execution. In addition, for these instances, the corresponding value in the column cplex lb is different from the best solution found by cplex and the time reported corresponds to the running time required to reach the best solution. Column cm gap provides the gap between the best lower bound found by cplex and the best solution found by the proposed algorithm. The symbol * in column cm indicates that the proposed algorithm found an optimal solution. |  | | --- | --- | | | |  | | | |
| --- | --- | --- | --- | --- | --- | --- | --- | --- |
|  |  |  |  |  |  |  |
| Name | cplex | cm | cplex lb | cm gap | cplex time | cm time |
|  |  |  |  |  |  |  |
|  |  |  |  |  |  |  |
|  |  |  |  |  |  |  |
|  |  |  |  |  |  |  |
| Test Bed B - 800x4400 | | |  |  |  |  |
|  |  |  |  |  |  |  |
| 31 | 984740.91487 | 984740.91486* | 984740.91487 | 0.0000 | 5383 | 143 |
| 32 | 1009311.85140 | 1009311.85140* | 1009311.85140 | 0.0000 | 723 | 185 |
| 33 | 1013373.30940 | 1013373.30940* | 1013373.30940 | 0.0000 | 5080 | 156 |
| 34 | 1006226.90752 | 1006226.90752* | 1006226.90752 | 0.0000 | 3526 | 115 |
| 35 | 1018799.28271 | 1018799.28271* | 1018799.28271 | 0.0000 | 888 | 118 |
| 36 | 714878.26898m | 714695.51607 | 713784.38575 | 0.1276 | 3044 | 254 |
| 37 | 674884.44383m | 674327.97009 | 673344.50127 | 0.1461 | 1145 | 1410 |
| 38 | 676820.62173m | 675805.21872 | 674700.47846 | 0.1637 | 1506 | 539 |
| 39 | 692047.07498m | 691609.79636 | 690942.12044 | 0.0966 | 1027 | 121 |
| 40 | 663528.65086m | 663490.48920 | 662976.03220 | 0.0776 | 2782 | 541 |
| 41 | 537104.66036m | 536777.45832 | 535928.02884 | 0.1585 | 4024 | 525 |
| 42 | 534142.99291m | 531627.18399 | 529668.00583 | 0.3699 | 911 | 930 |
| 43 | 534679.22113m | 534474.27478 | 533421.73501 | 0.1973 | 4472 | 529 |
| 44 | 531860.49047m | 530669.52700 | 529556.34462 | 0.2102 | 629 | 385 |
| 45 | 541111.17749m | 540314.09725 | 538744.23213 | 0.2914 | 1280 | 388 |
| 46 | 344911.71369m | 344830.51014 | 344210.31958 | 0.1802 | 2512 | 668 |
| 47 | 336140.19456m | 336111.49050 | 335610.01621 | 0.1494 | 3669 | 256 |
| 48 | 328283.34951m | 328296.05052 | 327802.31251 | 0.1506 | 3243 | 1342 |
| 49 | 332542.54142m | 332416.52638 | 331750.41086 | 0.2008 | 899 | 1081 |
|  |  |  |  |  |  |  |
| 50 | 340213.95911m | 340194.68386 | 339561.10159 | 0.1866 | 3981 | 1351 |
| 51 | 313506.22886m | 313506.22886 | 313456.67410 | 0.0158 | 2881 | 104 |
| 52 | 318863.56689m | 318839.09416 | 318563.82150 | 0.0864 | 761 | 122 |
| 53 | 320365.71895m | 320296.30159 | 319904.68543 | 0.1224 | 873 | 537 |
| 54 | 321323.72449m | 321311.65142 | 321151.13140 | 0.0500 | 2655 | 686 |
| 55 | 312818.57939m | 312802.85045 | 312542.69726 | 0.0832 | 926 | 261 |
|  |  |  |  |  |  |  |
| Test Bed B - 1000x1000 | | |  |  |  |  |
|  |  |  |  |  |  |  |
| 31 | 1009052.22635 | 1009052.22635* | 1009052.22635 | 0.0000 | 618 | 71 |
| 32 | 960222.78861 | 960222.78861* | 960222.78861 | 0.0000 | 295 | 65 |
| 33 | 999570.21657 | 999570.21657* | 999570.21657 | 0.0000 | 188 | 94 |
| 34 | 998906.49963 | 998906.49963* | 998906.49963 | 0.0000 | 376 | 108 |
| 35 | 1020804.47352 | 1020804.47352* | 1020804.47352 | 0.0000 | 422 | 108 |
| 36 | 605976.40375 | 605976.40375* | 605976.40375 | 0.0000 | 1093 | 108 |
| 37 | 596561.82172 | 596561.82172* | 596561.82172 | 0.0000 | 890 | 212 |
| 38 | 622213.00597 | 622213.00597* | 622213.00597 | 0.0000 | 509 | 152 |
| 39 | 587007.96835 | 587007.96835* | 587007.96835 | 0.0000 | 717 | 209 |
| 40 | 617652.87296 | 617652.87296* | 617652.87296 | 0.0000 | 949 | 190 |
| 41 | 396619.58315 | 396619.58315* | 396619.58315 | 0.0000 | 773 | 219 |
| 42 | 380313.04965 | 380313.04965* | 380313.04965 | 0.0000 | 566 | 108 |
| 43 | 393433.31419 | 393433.31419* | 393433.31419 | 0.0000 | 1032 | 332 |
|  |  |  |  |  |  |  |
| 44 | 400760.80226 | 400760.80226* | 400760.80226 | 0.0000 | 716 | 434 |
| 45 | 391616.50834 | 391616.50834* | 391616.50834 | 0.0000 | 1256 | 107 |
| 46 | 158934.91255 | 158998.61971 | 158841.31586 | 0.0990 | 10002 | 673 |
| 47 | 162594.04630 | 162689.34189 | 162358.79174 | 0.2036 | 10003 | 333 |
| 48 | 155564.00067 | 155621.44331 | 155390.50385 | 0.1486 | 10003 | 107 |
| 49 | 153085.60963m | 153267.89403 | 153085.60955 | 0.1191 | 8328 | 220 |
| 50 | 152008.86747 | 152065.07850 | 151890.15789 | 0.1152 | 10002 | 332 |
| 51 | 118960.26417 | 118960.26417 | 118896.22422 | 0.0539 | 10002 | 332 |
| 52 | 114889.65837 | 114889.65837 | 114783.31544 | 0.0926 | 10002 | 332 |
| 53 | 117535.56704 | 117601.81814 | 117248.35445 | 0.3015 | 10002 | 674 |
| 54 | 117585.94720 | 117585.94720 | 117480.31400 | 0.0899 | 10002 | 1127 |
| 55 | 115264.19555 | 115375.97469 | 115163.64079 | 0.1844 | 10002 | 107 |
| 56 | 101922.48852 | 101922.48852* | 101922.48852 | 0.0000 | 467 | 220 |
| 57 | 97768.19530 | 97768.19530* | 97768.19530 | 0.0000 | 664 | 108 |
| 58 | 99664.73382 | 99664.73382* | 99664.73382 | 0.0000 | 783 | 220 |
| 59 | 105538.17947 | 105538.17947* | 105538.17947 | 0.0000 | 753 | 333 |
| 60 | 100207.56922 | 100207.56922* | 100207.56922 | 0.0000 | 3368 | 1022 |
|  |  |  |  |  |  |  |
| Test Bed B - 1000x4000 | | |  |  |  |  |
|  |  |  |  |  |  |  |
| 31 | 1168212.08808m | 1168204.86144 | 1168161.51799 | 0.0037 | 963 | 262 |
| 32 | 1148442.83092 | 1148442.83092* | 1148442.83092 | 0.0000 | 1231 | 336 |
|  |  |  |  |  |  |  |
| 33 | 1133833.12952m | 1133803.95018 | 1133720.27685 | 0.0074 | 611 | 931 |
| 34 | 1100116.25269m | 1100087.18529 | 1100042.06150 | 0.0041 | 1724 | 129 |
| 35 | 1178795.41321m | 1178596.29448 | 1178444.87955 | 0.0128 | 770 | 432 |
| 36 | 755639.73759m | 755258.85090 | 754700.61083 | 0.0740 | 1104 | 1124 |
| 37 | 737825.84701m | 737316.49619 | 736709.40820 | 0.0824 | 1029 | 114 |
| 38 | 746010.75222m | 745237.32891 | 744501.69350 | 0.0988 | 681 | 114 |
| 39 | 758051.88613m | 757400.75721 | 756603.62182 | 0.1054 | 707 | 723 |
| 40 | 750792.67827m | 750292.53929 | 749796.14342 | 0.0662 | 604 | 114 |
| 41 | 560673.88666m | 560006.37179 | 559167.36743 | 0.1500 | 717 | 1059 |
| 42 | 572151.94865m | 564785.62220 | 563303.06348 | 0.2632 | 829 | 1065 |
| 43 | 551720.97236m | 550185.35707 | 548752.10006 | 0.2612 | 866 | 472 |
| 44 | 585892.96098m | 584561.60139 | 583256.84630 | 0.2237 | 819 | 940 |
| 45 | 562132.83149m | 561162.76345 | 560393.62821 | 0.1372 | 1438 | 823 |
| 46 | 321194.39364m | 321125.67876 | 319982.29464 | 0.3573 | 1097 | 586 |
| 47 | 316546.88488m | 316458.79630 | 315623.71612 | 0.2646 | 2839 | 707 |
| 48 | 320512.74170m | 320264.92440 | 319191.48305 | 0.3363 | 3196 | 586 |
| 49 | 315851.46932m | 315796.36129 | 314881.87919 | 0.2904 | 1171 | 823 |
| 50 | 321285.22539m | 320759.27596 | 319435.38092 | 0.4144 | 713 | 1177 |
| 51 | 289084.73190m | 288690.62505 | 288112.82598 | 0.2005 | 472 | 239 |
| 52 | 284105.83739m | 284040.39109 | 283742.18371 | 0.1051 | 733 | 115 |
|  |  |  |  |  |  |  |
| 53 | 287162.80121m | 287087.09168 | 286641.65231 | 0.1554 | 2449 | 355 |
| 54 | 289740.66420m | 289665.59263 | 289257.68912 | 0.1410 | 1812 | 115 |
| 55 | 286495.46841m | 286337.50819 | 285804.81819 | 0.1864 | 781 | 832 |
| 56 | 273028.85452 | 273028.85455* | 273028.85452 | 0.0000 | 1293 | 739 |
| 57 | 270303.18648 | 270303.18648* | 270303.18648 | 0.0000 | 832 | 109 |
| 58 | 273931.23400m | 273856.08267 | 273602.97102 | 0.0925 | 948 | 779 |
| 59 | 275054.37437m | 275054.37437 | 274995.31936 | 0.0215 | 932 | 241 |
| 60 | 275230.13588m | 275196.50532 | 274998.56354 | 0.0720 | 1105 | 1289 |
|  |  |  |  |  |  |  |
| Test Bed B - 1200x3000 | | |  |  |  |  |
|  |  |  |  |  |  |  |
| 31 | 1222958.30850m | 1222965.08070 | 1222947.7005 | 0.0014 | 3371 | 519 |
| 32 | 1235007.96380 | 1235007.96380* | 1235007.96380 | 0.0000 | 973 | 1402 |
| 33 | 1263641.92210m | 1263630.13644 | 1263560.2461 | 0.0055 | 1361 | 622 |
| 34 | 1257483.52362 | 1257483.52362* | 1257483.52362 | 0.0000 | 525 | 168 |
| 35 | 1253171.35760m | 1253171.35762 | 1253095.5204 | 0.0061 | 1372 | 167 |
| 36 | 798789.97380m | 798686.77541 | 798342.6694 | 0.0431 | 1228 | 541 |
| 37 | 790479.83770m | 790381.04177 | 790127.9737 | 0.0320 | 1258 | 693 |
| 38 | 787298.29400m | 787073.65657 | 786789.6308 | 0.0361 | 1745 | 108 |
| 39 | 789876.51320m | 789785.82885 | 789536.6932 | 0.0316 | 2176 | 383 |
| 40 | 789016.03220m | 788981.03495 | 788868.1969 | 0.0143 | 2160 | 382 |
| 41 | 566533.07390m | 566461.85738 | 566113.8535 | 0.0615 | 3381 | 1406 |
|  |  |  |  |  |  |  |
| 42 | 551647.90720m | 551101.49434 | 550338.4783 | 0.1386 | 295 | 1414 |
| 43 | 548378.46470m | 548274.09038 | 547645.0394 | 0.1149 | 1216 | 801 |
| 44 | 559311.20710m | 558452.34699 | 557837.6209 | 0.1102 | 1208 | 228 |
| 45 | 550072.70271m | 549792.27333 | 549156.44101 | 0.1158 | 1935 | 1406 |
| 46 | 273465.58347m | 273404.05836 | 272391.87854 | 0.3716 | 3452 | 1047 |
| 47 | 270483.02351m | 269393.43534 | 268148.80611 | 0.4642 | 590 | 816 |
| 48 | 274308.00565m | 273135.09795 | 271501.53326 | 0.6017 | 583 | 811 |
| 49 | 270877.01139m | 270698.55941 | 269589.39390 | 0.4114 | 2877 | 1171 |
| 50 | 270256.44242m | 269352.19090 | 268133.39990 | 0.4545 | 3795 | 1161 |
| 51 | 229788.07215m | 229744.97774 | 229467.02459 | 0.1211 | 3035 | 816 |
| 52 | 239495.82282m | 239316.5118 | 238756.14745 | 0.2347 | 879 | 243 |
| 53 | 236781.46254m | 36523.97497 | 235979.29472 | 0.2308 | 2110 | 594 |
| 54 | 229650.95643m | 229595.93288 | 229053.70261 | 0.2367 | 2009 | 593 |
| 55 | 236081.41857m | 236092.84005 | 235518.09602 | 0.2440 | 3267 | 710 |
| 56 | 218449.27494m | 218449.27494 | 218410.20524 | 0.0179 | 1115 | 123 |
| 57 | 215017.89032m | 215012.42025 | 214901.65957 | 0.0515 | 3496 | 714 |
| 58 | 215966.60633 | 215966.60633* | 215966.60633 | 0.0000 | 2498 | 599 |
| 59 | 217370.00019 | 217370.00060* | 217370.00019 | 0.0000 | 2589 | 244 |
| 60 | 213270.37958m | 213266.39296 | 213227.81526 | 0.0181 | 2472 | 243 |
|  |  |  |  |  |  |  |
| Test Bed B - 2000x2000 | | |  |  |  |  |
|  |  |  |  |  |  |  |
|  |  |  |  |  |  |  |
| 31 | 1929208.96143m | 1929202.48444 | 1929185.69100 | 0.0009 | 1445 | 155 |
| 32 | 1953696.17483m | 1953654.39059 | 1953619.66492 | 0.0018 | 980 | 123 |
| 33 | 1918062.62457m | 1918046.20116 | 1918028.06762 | 0.0009 | 684 | 323 |
| 34 | 1916484.74747m | 1916468.91875 | 1916447.65054 | 0.0011 | 1022 | 104 |
| 35 | 1899655.96510m | 1899637.64323 | 1899616.52881 | 0.0011 | 1563 | 173 |
| 36 | 1139240.45956m | 1139222.18427 | 1139208.97073 | 0.0012 | 1237 | 96 |
| 37 | 1137226.79386m | 1136981.16389 | 1136852.60991 | 0.0113 | 959 | 1079 |
| 38 | 1149367.07161m | 1149247.83489 | 1149074.88845 | 0.0151 | 1414 | 489 |
| 39 | 1153266.90342m | 1153261.58737 | 1153218.72881 | 0.0037 | 1140 | 164 |
| 40 | 1154609.21442m | 1154591.54183 | 1154547.53746 | 0.0038 | 1772 | 169 |
| 41 | 751972.32101m | 751868.16974 | 751695.29436 | 0.0230 | 657 | 312 |
| 42 | 749914.09311m | 749772.55463 | 749611.26740 | 0.0215 | 956 | 166 |
| 43 | 763214.83425m | 763162.33560 | 763093.45528 | 0.0090 | 1268 | 150 |
| 44 | 787213.02461m | 787097.34107 | 786937.04066 | 0.0204 | 1289 | 169 |
| 45 | 762253.62606m | 762175.87825 | 762011.12446 | 0.0216 | 1160 | 168 |
| 46 | 281253.43091m | 281278.55128 | 280721.39911 | 0.1985 | 2771 | 1442 |
| 47 | 281516.32040m | 272586.02693 | 271978.26466 | 0.2235 | 621 | 600 |
| 48 | 276366.90089m | 276200.54661 | 275673.39315 | 0.1912 | 2577 | 1464 |
| 49 | 274509.46763m | 274205.92388 | 273662.26283 | 0.1987 | 3122 | 1366 |
| 50 | 274523.04865m | 274305.36125 | 273595.28672 | 0.2595 | 733 | 895 |
|  |  |  |  |  |  |  |
| 51 | 206896.78955m | 194210.22215 | 193321.40718 | 0.4598 | 607 | 897 |
| 52 | 194771.18442m | 194443.42519 | 193526.66622 | 0.4737 | 3553 | 324 |
| 53 | 195940.57562m | 195482.61489 | 194142.04739 | 0.6905 | 2569 | 894 |
| 54 | 198830.30813m | 198528.90963 | 197545.08858 | 0.4980 | 3150 | 1042 |
| 55 | 199157.36501m | 196447.58800 | 195350.75253 | 0.5615 | 661 | 887 |
| 56 | 161469.10780m | 161378.75513 | 160925.70040 | 0.2815 | 2501 | 604 |
| 57 | 157367.70871m | 157330.36566 | 156986.87508 | 0.2188 | 888 | 754 |
| 58 | 158336.12379m | 158310.51110 | 157996.62051 | 0.1987 | 768 | 603 |
| 59 | 158826.47855m | 158718.02351 | 158282.16553 | 0.2754 | 867 | 900 |
| 60 | 155992.39240m | 155541.17354 | 155097.87810 | 0.2858 | 640 | 1045 |
|  |  |  |  |  |  |  |
|  |  |  |  |  |  |  |
|  |  |  |  |  |  |  |
|  |  |  |  |  |  |  |
|  |  |  |  |  |  |  |
|  |  |  |  |  |  |  |
|  |  |  |  |  |  |  |
|  |  |  |  |  |  |  |

| **Table 18.:**   | Results on the largest instances of the OR Library for the SS-CFLP, i.e., the cap instances (A, B, and C). All these instances have 100 facilities and 1000 customers. All these instances have been solved to optimality, both by [Guastaroba and Speranza](#Xguastaroba:speranza:14) ([2014](#Xguastaroba:speranza:14)) and by the proposed algorithm. In the column cplex, the symbol t indicates that an optimal solution was not found within the time limit of 10,000 cpu seconds. In these cases, the corresponding value in the column cplex lb is different from the best solution found by cplex. However, the optimality of such a solution is claimed in [Guastaroba and Speranza](#Xguastaroba:speranza:14) ([2014](#Xguastaroba:speranza:14)). Column cm gap provides the gap between the best solution found by cplex and the solution found by the proposed algorithm. |  | | --- | --- | | | |  | | | |
| --- | --- | --- | --- | --- | --- | --- | --- | --- |
|  |  |  |  |  |  |  |
| Name | cplex | cm | cplex lb | cm gap | cplex time | cm time |
|  |  |  |  |  |  |  |
|  |  |  |  |  |  |  |
|  |  |  |  |  |  |  |
|  |  |  |  |  |  |  |
| OR Library - Cap A | | |  |  |  |  |
|  |  |  |  |  |  |  |
| capa1 | 19241056.93284 | 19241056.93284* | 19241056.93284 | 0.0 | 3453 | 49 |
| capa2 | 18438329.78472t | 18438329.78472 | 17961522.50944 | 0.0 | 10025 | 59 |
| capa3 | 17765201.94899 | 17765201.94899* | 17765201.94899 | 0.0 | 354 | 55 |
| capa4 | 17160612.23428 | 17160612.23428* | 17160612.23428 | 0.0 | 16 | 40 |
|  |  |  |  |  |  |  |
| OR Library - Cap B | | |  |  |  |  |
|  |  |  |  |  |  |  |
| capb1 | 13657464.23044 | 13657464.23044* | 13657464.23044 | 0.0 | 193 | 43 |
| capb2 | 13362529.34151 | 13362529.34151* | 13362529.34151 | 0.0 | 195 | 61 |
| capb3 | 13199213.18558 | 13199213.18558* | 13199213.18558 | 0.0 | 202 | 46 |
| capb4 | 13083203.73598 | 13083203.73598* | 13083203.73598 | 0.0 | 121 | 41 |
|  |  |  |  |  |  |  |
| OR Library - Cap C | | |  |  |  |  |
|  |  |  |  |  |  |  |
| capc1 | 11647410.49714 | 11647410.49714* | 11647410.49714 | 0.0 | 155 | 42 |
| capc2 | 11570437.68013 | 11570437.68013* | 11570437.68013 | 0.0 | 52 | 35 |
| capc3 | 11519169.78437 | 11519169.78437* | 11519169.78437 | 0.0 | 40 | 25 |
| capc4 | 11505861.86436 | 11505861.86436* | 11505861.86436 | 0.0 | 18 | 22 |
|  |  |  |  |  |  |  |
|  |  |  |  |  |  |  |
|  |  |  |  |  |  |  |
|  |  |  |  |  |  |  |
|  |  |  |  |  |  |  |
|  |  |  |  |  |  |  |
|  |  |  |  |  |  |  |
|  |  |  |  |  |  |  |

| **Table 19.:**   | Results on Test Bed 1 for the SS-CFLP. The symbol * indicates that the cm algorithm found an optimal solution. The symbol ♯ in the column cplex indicates discrepancies with the optimal values reported in the literature. That is, the optimal value we obtained with cplex is different from the (optimal) value reported in [Guastaroba and Speranza](#Xguastaroba:speranza:14) ([2014](#Xguastaroba:speranza:14)). Such differences are due to a more stringent optimality tolerance value used in this paper. Column best gap reports the best value reported in the literature ([Guastaroba and Speranza](#Xguastaroba:speranza:14) [2014](#Xguastaroba:speranza:14)). Column cm gap provides the gap between the best lower bound found by cplex and the solution found by the proposed algorithm. Note that for some instances (27 out of 100), the proposed algorithm found a solution that is better than the one found by cplex within the allotted time limit. Of course, this is possible only in the cases in which an optimal solution has not been found by cplex. |  | | --- | --- | | | |  | | | | |
| --- | --- | --- | --- | --- | --- | --- | --- | --- | --- |
|  |  |  |  |  |  |  |  |
| Name | cplex | cm | cplex lb | cm gap | best gap | cplex time | cm time |
|  |  |  |  |  |  |  |  |
|  |  |  |  |  |  |  |  |
|  |  |  |  |  |  |  |  |
|  |  |  |  |  |  |  |  |
| Test Bed 1 - 300x300 | | |  |  |  |  |  |
|  |  |  |  |  |  |  |  |
| 1 | 16555.7731 | 16616.5632 | 16552.7511 | 0.39 | 1.71 | 10000 | 2204 |
| 2 | 16139.9952 | 16187.6999 | 16059.3448 | 0.80 | 1.52 | 10000 | 1718 |
| 3 | 15702.8430 | 15687.3836 | 15606.1002 | 0.52 | 1.51 | 10000 | 1309 |
| 4 | 18312.6046 | 18326.5101 | 18143.8918 | 1.01 | 2.22 | 10000 | 3500 |
| 5 | 18315.4375 | 18377.4067 | 18191.1132 | 1.02 | 1.88 | 10000 | 2582 |
| 6 | 11332.5182 | 11332.2443 | 11271.2207 | 0.54 | 0.77 | 10000 | 2323 |
| 7 | 11470.3145 | 11478.0114 | 11461.1617 | 0.15 | 0.71 | 10000 | 961 |
| 8 | 11449.6705 | 11449.6705* | 11449.6705 | 0.00 | 0.00 | 544 | 433 |
| 9 | 10932.8807 | 10932.8807* | 10932.8808 | 0.00 | 0.00 | 1426 | 342 |
| 10 | 11324.3383 | 11343.4440 | 11324.3383 | 0.17 | 0.82 | 1126 | 340 |
| 11 | 10046.9389 | 10046.9389* | 10046.9389 | 0.00 | 0.00 | 34 | 25 |
| 12 | 9359.6406 | 9359.6406* | 9359.6406 | 0.00 | 0.00 | 39 | 27 |
| 13 | 10103.4882 | 10103.4882* | 10103.4883 | 0.00 | 0.00 | 927 | 185 |
| 14 | 9738.0450 | 9738.0450* | 9738.0450 | 0.00 | 0.00 | 141 | 53 |
| 15 | 9902.2610 | 9902.2610* | 9902.2610 | 0.00 | 0.00 | 34 | 30 |
| 16 | 9168.0795 | 9168.0795* | 9168.0795 | 0.00 | 0.00 | 29 | 17 |
| 17 | 9181.0652 | 9181.0652* | 9181.0652 | 0.00 | 0.00 | 21 | 19 |
| 18 | 9581.9507 | 9581.9507* | 9581.9507 | 0.00 | 0.00 | 72 | 40 |
| 19 | 9062.1578 | 9062.1578* | 9062.1578 | 0.00 | 0.00 | 40 | 22 |
|  |  |  |  |  |  |  |  |
| 20 | 9077.8514 | 9077.8514* | 9077.8514 | 0.00 | 0.00 | 23 | 15 |
|  |  |  |  |  |  |  |  |
| Test Bed 1 - 300x1500 | | |  |  |  |  |  |
|  |  |  |  |  |  |  |  |
| 1 | 154999.1410 | 154999.1410* | 154999.1410 | 0.00 | 0.00 | 61 | 30 |
| 2 | 159438.0271 | 159438.0271* | 159438.0271 | 0.00 | 0.00 | 55 | 34 |
| 3 | 157300.1514 | 157300.1514* | 157300.1514 | 0.00 | 0.00 | 73 | 70 |
| 4 | 157796.2798 | 157796.2798* | 157796.2798 | 0.00 | 0.00 | 97 | 78 |
| 5 | 161305.9717 | 161305.9717* | 161305.9717 | 0.00 | 0.00 | 62 | 30 |
| 6 | 156667.3093♯ | 156667.3093* | 156667.3093 | 0.00 | 0.00 | 42 | 22 |
| 7 | 157031.5530 | 157031.5530* | 157031.5530 | 0.00 | 0.00 | 43 | 42 |
| 8 | 157796.2079♯ | 157796.2079* | 157796.2079 | 0.00 | 0.00 | 45 | 22 |
| 9 | 156968.4623 | 156968.4623* | 156968.4623 | 0.00 | 0.00 | 44 | 21 |
| 10 | 157757.6248♯ | 157757.6248* | 157757.6248 | 0.00 | 0.00 | 45 | 22 |
| 11 | 150015.1263 | 150015.1263* | 150015.1263 | 0.00 | 0.00 | 35 | 18 |
| 12 | 154937.6694 | 154937.6694* | 154937.6694 | 0.00 | 0.00 | 45 | 22 |
| 13 | 151608.4176 | 151608.4176* | 151608.4176 | 0.00 | 0.00 | 39 | 19 |
| 14 | 151848.0456 | 151848.0456* | 151848.0456 | 0.00 | 0.00 | 39 | 19 |
| 15 | 156480.8866 | 156480.8866* | 156480.8866 | 0.00 | 0.00 | 42 | 20 |
| 16 | 155493.7736♯ | 155493.7736* | 155493.7736 | 0.00 | 0.00 | 36 | 17 |
| 17 | 156038.0351 | 156038.0351* | 156038.0351 | 0.00 | 0.00 | 37 | 19 |
| 18 | 156790.7519♯ | 156790.7519* | 156790.7519 | 0.00 | 0.00 | 38 | 19 |
|  |  |  |  |  |  |  |  |
| 19 | 155947.1272 | 155947.1272* | 155947.1272 | 0.00 | 0.00 | 33 | 37 |
| 20 | 156426.1372 | 156426.1372* | 156426.1372 | 0.00 | 0.00 | 41 | 19 |
|  |  |  |  |  |  |  |  |
| Test Bed 1 - 500x500 | | |  |  |  |  |  |
|  |  |  |  |  |  |  |  |
| 1 | 26890.17194 | 26890.17194 | 26566.6902 | 1.22 | 1.56 | 5824 | 696 |
| 2 | 28654.33819 | 28651.15869 | 28268.40525 | 1.35 | 1.85 | 5135 | 1771 |
| 3 | 28458.28206 | 28406.79118 | 28067.68826 | 1.21 | 1.8 | 5656 | 2221 |
| 4 | 28562.59436 | 28562.59436 | 28268.36331 | 1.04 | 2.04 | 1000 | 1452 |
| 5 | 25050.50007 | 25050.50007 | 24805.55654 | 0.99 | 1.73 | 5559 | 1567 |
| 6 | 15853.35405 | 15867.33237 | 15842.27327 | 0.16 | 0.64 | 1000 | 2069 |
| 7 | 16205.14570 | 16205.1457 | 16163.11149 | 0.26 | 0.60 | 1001 | 1632 |
| 8 | 16115.85144 | 16126.51257 | 16081.54445 | 0.28 | 0.70 | 8624 | 1320 |
| 9 | 16440.35676 | 16424.92498 | 16346.24658 | 0.48 | 0.44 | 1001 | 1203 |
| 10 | 15886.54210 | 15890.2416 | 15857.97227 | 0.20 | 0.73 | 1000 | 1209 |
| 11 | 13497.71301 | 13497.71301* | 13497.71301 | 0.00 | 0.00 | 134 | 211 |
| 12 | 14736.37874 | 14736.37874* | 14736.37874 | 0.00 | 0.42 | 873 | 870 |
| 13 | 13715.95623 | 13715.95623 | 13709.75891 | 0.05 | 0.36 | 1000 | 2309 |
| 14 | 13629.53554 | 13629.53554* | 13629.53554 | 0.00 | 0.03 | 459 | 315 |
| 15 | 13947.12424 | 13947.3838 | 13940.07679 | 0.05 | 0.36 | 977 | 544 |
| 16 | 12618.67683 | 12618.67683* | 12618.67683 | 0.00 | 0.00 | 446 | 207 |
| 17 | 13386.16855 | 13386.16855* | 13386.16855 | 0.00 | 0.00 | 202 | 293 |
|  |  |  |  |  |  |  |  |
| 18 | 12852.52183 | 12852.52183* | 12852.52183 | 0.00 | 0.00 | 116 | 197 |
| 19 | 13521.51710 | 13521.51710* | 13521.5171 | 0.00 | 0.00 | 285 | 211 |
| 20 | 12362.19543 | 12362.19543* | 12362.19543 | 0.00 | 0.00 | 59 | 183 |
|  |  |  |  |  |  |  |  |
| Test Bed 1 - 700x700 | | |  |  |  |  |  |
|  |  |  |  |  |  |  |  |
| 1 | 37875.57107 | 37751.07579 | 37054.59534 | 1.88 | 2.29 | 9186 | 1389 |
| 2 | 35379.46023 | 35076.86113 | 34488.56479 | 1.71 | 2.23 | 7340 | 897 |
| 3 | 35522.26120 | 35501.97142 | 34485.23661 | 2.95 | 1.99 | 8623 | 996 |
| 4 | 39222.81605 | 38860.33618 | 38260.98339 | 1.57 | 2.02 | 7323 | 775 |
| 5 | 38894.10617 | 38459.85654 | 37950.49331 | 1.34 | 1.74 | 10002 | 691 |
| 6 | 20238.92213 | 20099.85153 | 19881.111 | 1.10 | 0.95 | 5828 | 783 |
| 7 | 21475.96951 | 21475.96951 | 21295.2484 | 0.85 | 0.93 | 10001 | 1339 |
| 8 | 20891.67491 | 20891.67491 | 20702.9542 | 0.91 | 0.79 | 7332 | 1039 |
| 9 | 21132.16950 | 21102.38811 | 20976.6455 | 0.60 | 0.59 | 6136 | 823 |
| 10 | 22417.88505 | 22317.86937 | 22039.40081 | 1.26 | 1.19 | 10047 | 950 |
| 11 | 17199.72028 | 17199.72028 | 17105.76697 | 0.55 | 0.44 | 10017 | 1006 |
| 12 | 18201.28838 | 18201.28838 | 18135.9678 | 0.36 | 0.69 | 10026 | 1352 |
| 13 | 17284.72383 | 17284.72383 | 17277.92058 | 0.04 | 0.32 | 10012 | 1298 |
| 14 | 17383.87471 | 17383.87471 | 17374.91007 | 0.05 | 0.29 | 10025 | 1006 |
| 15 | 18221.39279 | 18221.39279 | 18167.97605 | 0.29 | 0.51 | 10000 | 1425 |
| 16 | 16029.55479 | 16029.55479* | 16029.55478 | 0.00 | 0.00 | 2966 | 322 |
|  |  |  |  |  |  |  |  |
| 17 | 16199.54681 | 16199.54681* | 16199.54681 | 0.00 | 0.18 | 2304 | 818 |
| 18 | 16443.07196 | 16443.07196* | 16443.07195 | 0.00 | 0.18 | 3757 | 655 |
| 19 | 16399.79165 | 16399.79165* | 16399.79166 | 0.00 | 0.02 | 3971 | 265 |
| 20 | 15492.02329 | 15492.02329 | 15476.99275 | 0.10 | 0.78 | 10000 | 429 |
|  |  |  |  |  |  |  |  |
| Test Bed 1 - 1000x1000 | | |  |  |  |  |  |
|  |  |  |  |  |  |  |  |
| 1 | 51171.77395 | 51171.77395 | 49681.02057 | 3.00 | 3.11 | 10000 | 1604 |
| 2 | 51892.13052 | 51676.99711 | 50842.15798 | 1.64 | 1.95 | 10000 | 815 |
| 3 | 48712.44039 | 48141.97253 | 47362.62321 | 1.65 | 1.99 | 6605 | 980 |
| 4 | 50581.2278 | 50311.53022 | 49029.12187 | 2.62 | 2.78 | 10000 | 1566 |
| 5 | 52597.84151 | 51824.3774 | 50971.44463 | 1.67 | 2.13 | 10000 | 1046 |
| 6 | 28553.6709 | 28096.51364 | 27804.12858 | 1.05 | 0.98 | 6064 | 571 |
| 7 | 27803.34706 | 27522.11797 | 27210.2303 | 1.15 | 0.99 | 6935 | 789 |
| 8 | 27905.6991 | 27665.54892 | 27307.80561 | 1.31 | 1.06 | 7058 | 1414 |
| 9 | 27395.37677 | 27192.16322 | 26816.76906 | 1.40 | 1.23 | 10009 | 710 |
| 10 | 27594.36941 | 27594.36941 | 27178.05073 | 1.53 | 1.17 | 10004 | 1591 |
| 11 | 22441.55135 | 22340.00994 | 22117.84632 | 1.00 | 0.53 | 3580 | 375 |
| 12 | 22283.45783 | 22242.11672 | 22110.94699 | 0.59 | 0.33 | 5112 | 665 |
| 13 | 22801.73714 | 22793.45344 | 22592.8973 | 0.89 | 0.55 | 10000 | 1014 |
| 14 | 22617.30265 | 22409.98165 | 22273.27847 | 0.61 | 0.43 | 3061 | 279 |
| 15 | 22768.8243 | 22739.62557 | 22572.17322 | 0.74 | 0.43 | 7085 | 1220 |
|  |  |  |  |  |  |  |  |
| 16 | 21393.29674 | 21393.29674 | 21322.81432 | 0.33 | 0.4 | 10000 | 472 |
| 17 | 21247.26624 | 21247.26624 | 21209.82984 | 0.18 | 0.22 | 10000 | 1294 |
| 18 | 20752.91851 | 20752.91851 | 20739.1987 | 0.07 | 0.4 | 10000 | 716 |
| 19 | 20613.20958 | 20613.20958 | 20529.02341 | 0.41 | 0.43 | 10000 | 436 |
| 20 | 21630.74011 | 21621.29724 | 21541.51151 | 0.37 | 0.27 | 10000 | 1102 |
|  |  |  |  |  |  |  |  |
|  |  |  |  |  |  |  |  |
|  |  |  |  |  |  |  |  |
|  |  |  |  |  |  |  |  |
|  |  |  |  |  |  |  |  |
|  |  |  |  |  |  |  |  |
|  |  |  |  |  |  |  |  |
|  |  |  |  |  |  |  |  |

| **Table 20.:**   | Results on OR Library for the robust formulation MS-CFLP-RE. The uncertainty level is calibrated with Ω = 1.0 and ε = 0.01 and ε = 0.1. |  | | --- | --- | | | |  | | | |
| --- | --- | --- | --- | --- | --- | --- | --- | --- |
|  |  |  |  |  |  |  |
| Name | ε | cplex | cm | gap% | cplex time | cm time |
|  |  |  |  |  |  |  |
|  |  |  |  |  |  |  |
|  |  |  |  |  |  |  |
|  |  |  |  |  |  |  |
| OR Library - capA | | |  |  |  |  |
|  |  |  |  |  |  |  |
| 1 | 0.01 | 19245160.87818 | 19245160.87818 | 0.0 | 1676 | 191 |
|  | 0.1 | 19283519.76096 | 19283519.76096 | 0.0 | 1504 | 173 |
| 2 | 0.01 | 18442175.61419 | 18442175.61419 | 0.0 | 2398 | 201 |
|  | 0.1 | 18481564.18447 | 18481564.18447 | 0.0 | 5535 | 197 |
| 3 | 0.01 | 17769331.55330 | 17769331.55330 | 0.0 | 777 | 103 |
|  | 0.1 | 17801283.17701 | 17801283.17701 | 0.0 | 1919 | 109 |
| 4 | 0.01 | 17165079.38180 | 17165079.38180 | 0.0 | 418 | 96 |
|  | 0.1 | 17206884.01938 | 17206884.01938 | 0.0 | 383 | 105 |
|  |  |  |  |  |  |  |
| OR Library - capB | | |  |  |  |  |
|  |  |  |  |  |  |  |
| 1 | 0.01 | 13659673.92146 | 13659673.92146 | 0.0 | 424 | 133 |
|  | 0.1 | 13690841.42094 | 13690841.42094 | 0.0 | 234 | 67 |
| 2 | 0.01 | 13365738.88620 | 13365738.88620 | 0.0 | 611 | 116 |
|  | 0.1 | 13402079.52008 | 13402079.52008 | 0.0 | 681 | 104 |
| 3 | 0.01 | 13202598.50116 | 13202598.50116 | 0.0 | 1022 | 193 |
|  | 0.1 | 13242550.60925 | 13242550.60925 | 0.0 | 943 | 166 |
| 4 | 0.01 | 13087022.90432 | 13087022.90432 | 0.0 | 552 | 124 |
|  | 0.1 | 13128543.67434 | 13128543.67434 | 0.0 | 416 | 138 |
|  |  |  |  |  |  |  |
| OR Library - capC | | |  |  |  |  |
|  |  |  |  |  |  |  |
| 1 | 0.01 | 11649904.94794 | 11649904.94794 | 0.0 | 397 | 96 |
|  |  |  |  |  |  |  |
|  | 0.1 | 11680959.98833 | 11680959.98833 | 0.0 | 225 | 91 |
| 2 | 0.01 | 11572989.37969 | 11572989.37969 | 0.0 | 438 | 130 |
|  | 0.1 | 11599928.18964 | 11599928.18964 | 0.0 | 442 | 137 |
| 3 | 0.01 | 11521956.23570 | 11521956.23570 | 0.0 | 338 | 92 |
|  | 0.1 | 11550981.38286 | 11550981.38286 | 0.0 | 395 | 106 |
| 4 | 0.01 | 11508734.79953 | 11508734.79953 | 0.0 | 330 | 163 |
|  | 0.1 | 11535650.14637 | 11535650.14637 | 0.0 | 313 | 117 |
|  |  |  |  |  |  |  |
|  |  |  |  |  |  |  |
|  |  |  |  |  |  |  |
|  |  |  |  |  |  |  |
|  |  |  |  |  |  |  |
|  |  |  |  |  |  |  |
|  |  |  |  |  |  |  |
|  |  |  |  |  |  |  |
